# Supplementary material for: CRISPR/Cas9-mediated Tryptophan Hydroxylase 1 Knockout Decreases Calcium Transportation in Goat Mammary Epithelial Cells
Source: Research Square preprint supplement (doi:10.21203/rs.3.rs-95712/v1), 2020-10-23
Supplement: Supplementary file 1 [file 191ae423e7fa327592bb9193.docx]

**Table S1.** The primers for 10 off-target site detections.

| **Off target site** | **Primer sequence (5’ to 3’)** |
| --- | --- |
| OT1 | F: TGTGGGAGGCAGAACACATT  R: GCTTCTTGCTGCTGCCAAAT |
| OT2 | F: GGTGACCAGACTAACTGCCC  R: ACCATGCCTTGCTGTTCTCT |
| OT3 | F: GGAGAACTGCTCTGCCATGT  R: CTGTGATGAGATAGATCCTAGATGC |
| OT4 | F: CCCAAACCAGTCCTCTTTCT  R: TCCAGCCAGTACTTTGGGAA |
| OT5 | F: AGGTGAGGCCTAGAGAGAGA  R: AGTTCAGTCCTCCAGCTTGC |
| OT6 | F: ATGACACCACCCTTATGGCAG  R: AGTCAGTGATGCCATCCAGC |
| OT7 | F: TCAGGAAGCCCAAACCCTCT  R: AGTCTTCATGTTGGCACGGT |
| OT8 | F: TGACCTCCTCACTACACCTGA  R: AGATGTACTGACAACAGCCCA |
| OT9 | F: GATTCCTGCCTCTGGACTGA  R: GACACATCCTCATTTTGCCCC |
| OT10 | F: ACCCAGGTCTACACGAGTCAT  R: GGCTGGAGGGGGCGTTAG |
